# Supplementary material
Source: PubMed Central journal article supplement (PMC3459670)

## SUPPLEMENTARY MATERIALS:

Table S1.

Summary of X-ray data and model parameters of RutD protein

---

| <b>Summary of Crystallographic Information</b>    |                                   |
|---------------------------------------------------|-----------------------------------|
| <b>A. Data Collection and Phasing</b>             |                                   |
| <b>Beamline</b>                                   | 21 ID-F ANL                       |
| <b>Wavelength (Å)</b>                             | 0.9787                            |
| <b>Space group</b>                                | P4 <sub>1</sub> 2 <sub>1</sub> 2  |
| <b>Resolution range (Å)</b>                       | 50.00-2.10<br>(2.10-2.14)         |
| <b>Unit cell parameters</b>                       |                                   |
| <b>Length (Å)</b>                                 | a = 79.6<br>b = 79.6<br>c = 161.8 |
| <b>Angles (°)</b>                                 | $\alpha = \beta = \gamma = 90$    |
| <b>Wilson plot B (Å<sup>2</sup>)</b>              | 25.1                              |
| <b>R<sub>merge</sub></b>                          | 0.357*                            |
| <b>I/σ(I)</b>                                     | 11.6 (2.9)                        |
| <b>Completeness (%)</b>                           | 98.0 (95.0)                       |
| <b>Redundancy</b>                                 | 10.2 (8.4)                        |
| <b>No. of observations</b>                        | 315760                            |
| <b>No of unique reflections</b>                   | 19039 (898)                       |
| <b>Figure of merit for SAD phasing (after DM)</b> | 0.808                             |
| <b>B. Refinement</b>                              |                                   |
| <b>R<sub>work</sub>/R<sub>free</sub> (%)</b>      | 16.9/22.6                         |
| <b>No. of protein atoms</b>                       | 4060 (37.6)                       |
| <b>(B-factor, Å<sup>2</sup>)</b>                  |                                   |
| <b>No. of solvent atoms</b>                       | 313 (41.7)                        |
| <b>(B-factor, Å<sup>2</sup>)</b>                  |                                   |
| <b>No. of ligand atoms</b>                        | 33 (42.3)                         |
| <b>(B-factor, Å<sup>2</sup>)</b>                  |                                   |
| <b>R.m.s. deviations</b>                          |                                   |
| <b>Bond lengths (Å)</b>                           | 0.013                             |
| <b>Bond angles (°)</b>                            | 1.5                               |
| <b>Ramachandran plot</b>                          |                                   |
| <b>Most favored (%)</b>                           | 98.86                             |
| <b>Allowed (%)</b>                                | 1.14                              |
| <b>Disallowed (%)</b>                             | 0                                 |

---

\* High value of R<sub>merge</sub> is caused by multiple crystal lattices (Supplementary figure S3). When corrections for radiation decay and anisotropic diffraction are applied<sup>40,41</sup> the traditional crystallographic parameters are not the best to describe the quality of the diffraction data. Despite the very high R<sub>merge</sub> the R, R<sub>free</sub>, and geometrical parameters obtained after structure refinement are significantly better than for other structures deposited to PDB during the last two years.

Fig.S1. Multiple sequence alignment of protein sequences belonging to the RutD family, obtained by CLANS clustering. 100% conserved putative active site residues are highlighted: H87 and H237 in magenta, R128 in blue, and D209 in red (following the RutD sequence numbering). The residue C-terminal to H87 is also highlighted: A in teal, and S in grey. The RutD sequence is underscored.

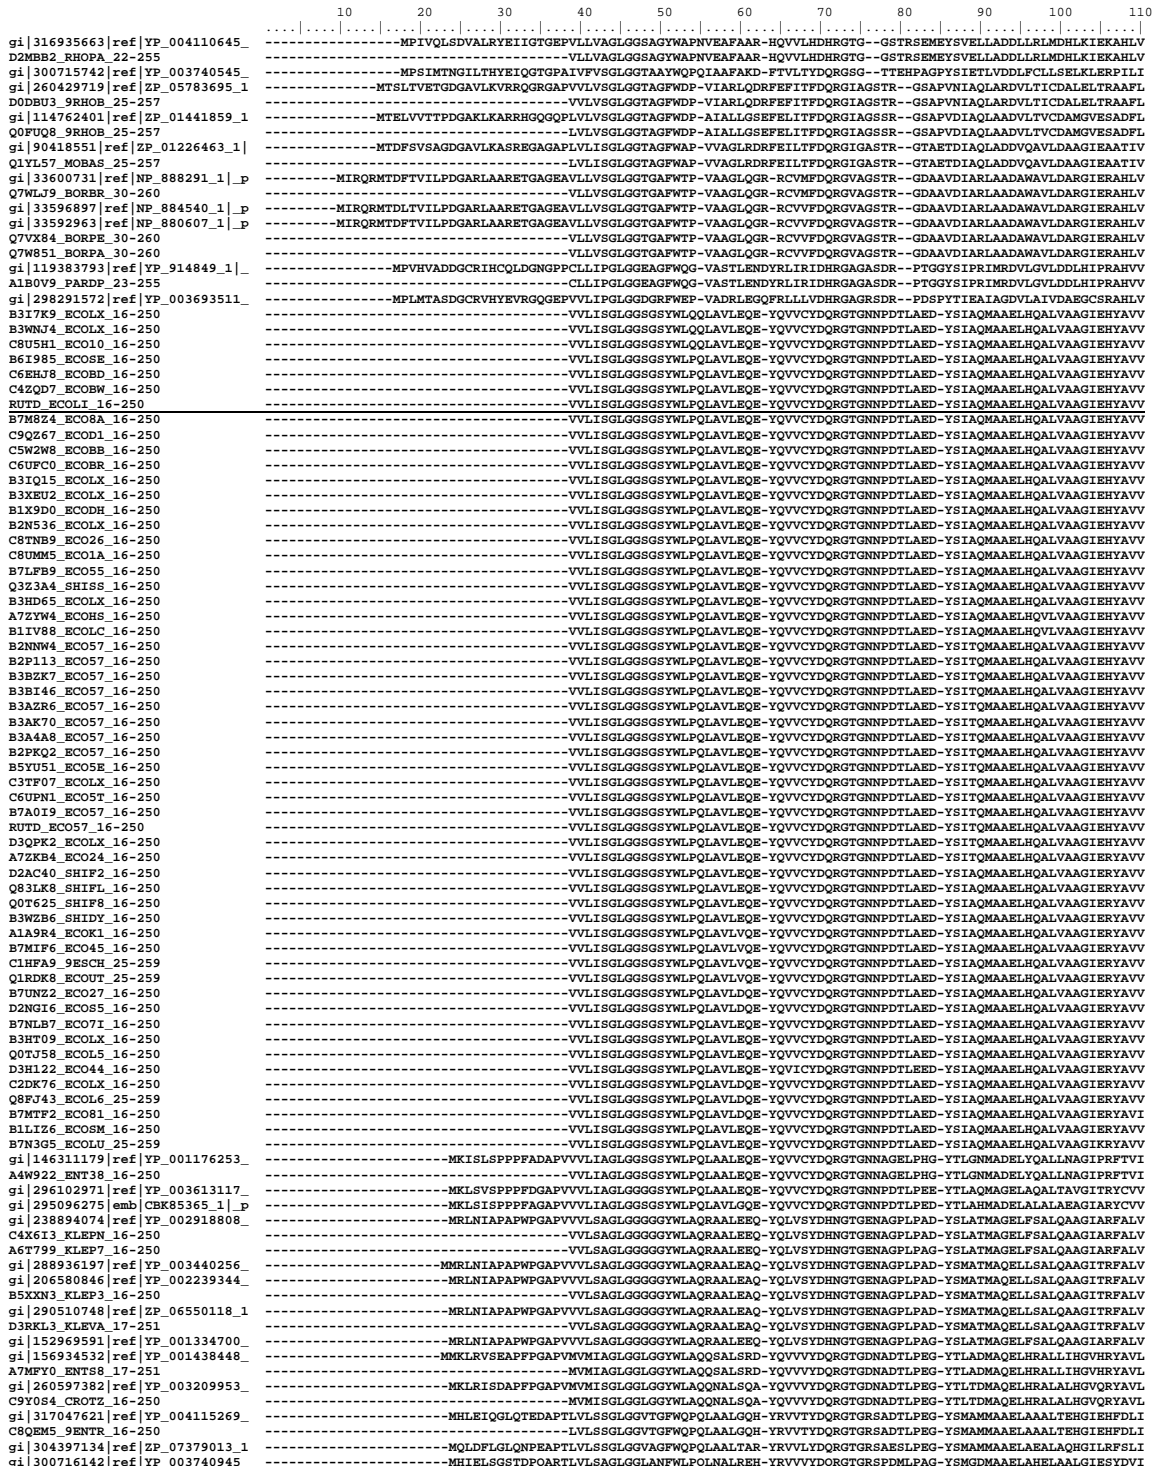

gi|123442221|ref|YP\_001006202|... MYFEITGQNSPAKTVVLSAGLGGSGRFWQPLSALGQH-FRVTYDQYGTGRSAGVTPSG-YTLADMADELADLALASQHTIERHYFV  
ALUMKI\_YRERB\_16-250 -----VLSAGLGGSGRFWQPLSALGQH-FRVTYDQYGTGRSAGVTPSG-YTLADMADELADLALASQHTIERHYFV  
gi|270261263|ref|ZP\_06189536\_1|... MYFEILGKDDTLPAAFTVLSAGLGGSGRFWQPLSALGQH-FRVTYDQYGTGRSAGVTPSG-YTLADMADELADLALASQHTIERHYFV  
DIRPC7\_SEROD\_16-250 -----VLSAGLGGSGRFWQPLSALGQH-FRVTYDQYGTGRSAGVTPSG-YTLADMADELADLALASQHTIERHYFV  
gi|157370062|ref|YP\_001478051|... MYFEILGKDDTLPAAFTVLSAGLGGSGRFWQPLSALGQH-FRVTYDQYGTGRSAGVTPSG-YTLADMADELADLALASQHTIERHYFV  
A8GCT3\_SERP5\_16-250 -----VLSAGLGGSGRFWQPLSALGQH-FRVTYDQYGTGRSAGVTPSG-YTLADMADELADLALASQHTIERHYFV  
gi|291619589|ref|YP\_003522331|... MYKVLGQQAADAEFTVLSAGLGGSGRFWQPLSALGQH-FRVTYDQYGTGRSAGVTPSG-YTLADMADELADLALASQHTIERHYFV  
D4G8U7\_PANAN\_16-250 -----VLSAGLGGSGRFWQPLSALGQH-FRVTYDQYGTGRSAGVTPSG-YTLADMADELADLALASQHTIERHYFV  
gi|322833714|ref|YP\_004213741|... MYKVLGQQAADAEFTVLSAGLGGSGRFWQPLSALGQH-FRVTYDQYGTGRSAGVTPSG-YTLADMADELADLALASQHTIERHYFV  
gi|146283917|ref|YP\_001174070|... MYELHGRMPEADPTVLSAGLGGSGRFWQPLSALGQH-FRVTYDQYGTGRSAGVTPSG-YTLADMADELADLALASQHTIERHYFV  
A4VQH7\_PSEU5\_16-250 -----VLSAGLGGSGRFWQPLSALGQH-FRVTYDQYGTGRSAGVTPSG-YTLADMADELADLALASQHTIERHYFV  
gi|302189116|ref|ZP\_07265789\_1|... MPFEHFAQHADAPTVLSAGLGGSGRFWQPLSALGQH-FRVTYDQYGTGRSAGVTPSG-YTLADMADELADLALASQHTIERHYFV  
gi|66044249|ref|YP\_234090\_1|\_A... MPFEHFAQHADAPTVLSAGLGGSGRFWQPLSALGQH-FRVTYDQYGTGRSAGVTPSG-YTLADMADELADLALASQHTIERHYFV  
Q4ZXSO\_PSEU2\_16-250 -----VLSAGLGGSGRFWQPLSALGQH-FRVTYDQYGTGRSAGVTPSG-YTLADMADELADLALASQHTIERHYFV  
gi|71735511|ref|YP\_273315\_1|\_a... MPFEIHRQHADAPTVLSAGLGGSGRFWQPLSALGQH-FRVTYDQYGTGRSAGVTPSG-YTLADMADELADLALASQHTIERHYFV  
Q48M7\_PSEI4\_16-248 -----VLSAGLGGSGRFWQPLSALGQH-FRVTYDQYGTGRSAGVTPSG-YTLADMADELADLALASQHTIERHYFV  
gi|289626193|ref|ZP\_06459147\_1|... MPFEIHRQHADAPTVLSAGLGGSGRFWQPLSALGQH-FRVTYDQYGTGRSAGVTPSG-YTLADMADELADLALASQHTIERHYFV  
gi|257482056|ref|ZP\_05636097\_1|... MPFEIHRQHADAPTVLSAGLGGSGRFWQPLSALGQH-FRVTYDQYGTGRSAGVTPSG-YTLADMADELADLALASQHTIERHYFV  
gi|289648344|ref|ZP\_06479687\_1|... MPFEIHRQHADAPTVLSAGLGGSGRFWQPLSALGQH-FRVTYDQYGTGRSAGVTPSG-YTLADMADELADLALASQHTIERHYFV  
gi|320325736|gb|EF801797\_1|\_a... MPFEIHRQHADAPTVLSAGLGGSGRFWQPLSALGQH-FRVTYDQYGTGRSAGVTPSG-YTLADMADELADLALASQHTIERHYFV  
gi|28868369|ref|NP\_790988\_1|\_a... MPFEIHRQHADAPTVLSAGLGGSGRFWQPLSALGQH-FRVTYDQYGTGRSAGVTPSG-YTLADMADELADLALASQHTIERHYFV  
Q887X6\_PSESM\_16-250 -----VLSAGLGGSGRFWQPLSALGQH-FRVTYDQYGTGRSAGVTPSG-YTLADMADELADLALASQHTIERHYFV  
gi|213967180|ref|ZP\_03395329\_1|... MPFEIHRQHADAPTVLSAGLGGSGRFWQPLSALGQH-FRVTYDQYGTGRSAGVTPSG-YTLADMADELADLALASQHTIERHYFV  
gi|196155582|ref|YP\_002125071|... MPFEIHRQHADAPTVLSAGLGGSGRFWQPLSALGQH-FRVTYDQYGTGRSAGVTPSG-YTLADMADELADLALASQHTIERHYFV  
B4RRW2\_ALTMD\_35-269 -----VLSAGLGGSGRFWQPLSALGQH-FRVTYDQYGTGRSAGVTPSG-YTLADMADELADLALASQHTIERHYFV  
gi|23994720|ref|ZP\_04715244\_1|... MHSDDVQAYAHISGEMNGEMRNKTHYEIHLGTSPPADTVVPSGGLGGAAPFWQPLADFTQH-YRVTYDQYGTGRSAGVTPSG-YTLADMADELADLALASQHTIERHYFV  
gi|262376021|ref|ZP\_06069252\_1|... MSFLFH-HAQAQADAPYVLSAGLGGSGRFWQPLSALGQH-FRVTYDQYGTGRSAGVTPSG-YTLADMADELADLALASQHTIERHYFV  
D0SVA9\_ACILW\_16-255 -----VLSAGLGGSGRFWQPLSALGQH-FRVTYDQYGTGRSAGVTPSG-YTLADMADELADLALASQHTIERHYFV  
gi|293611018|ref|ZP\_06693317\_1|... MKYIYPCSSQKALVLPFSLGGLGHAHPFNQJLESSTH-FNVTYDQYGTGRSAGVTPSG-YTLADMADELADLALASQHTIERHYFV  
gi|262368332|ref|ZP\_06061661\_1|... MNVQIFPSSHLE-DADYVLSAGLGGSGRFWQPLSALGQH-FRVTYDQYGTGRSAGVTPSG-YTLADMADELADLALASQHTIERHYFV  
D0S9G1\_ACIOJ\_16-250 -----VLSAGLGGSGRFWQPLSALGQH-FRVTYDQYGTGRSAGVTPSG-YTLADMADELADLALASQHTIERHYFV  
gi|50083320|ref|YP\_044830\_1|\_a... MNYQLFKHSDENASVYVSSGGLGHAHPFNQJLESSTH-FNVTYDQYGTGRSAGVTPSG-YTLADMADELADLALASQHTIERHYFV  
Q6FFZ9\_ACIDJ\_16-255 -----VLSAGLGGSGRFWQPLSALGQH-FRVTYDQYGTGRSAGVTPSG-YTLADMADELADLALASQHTIERHYFV  
gi|255319344|ref|ZP\_05360561\_1|... MVEIYPCCKNSVTVLSAGLGGSGRFWQPLSALGQH-FRVTYDQYGTGRSAGVTPSG-YTLADMADELADLALASQHTIERHYFV  
C6RN00\_ACIRA\_16-250 -----VLSAGLGGSGRFWQPLSALGQH-FRVTYDQYGTGRSAGVTPSG-YTLADMADELADLALASQHTIERHYFV  
D0T3M4\_ACIRA\_16-250 -----VLSAGLGGSGRFWQPLSALGQH-FRVTYDQYGTGRSAGVTPSG-YTLADMADELADLALASQHTIERHYFV  
gi|316935661|ref|YP\_004110643|... MNASDSAVLVAEIVGRPESDAPTVLSAGLGGSGRFWQPLSALGQH-FRVTYDQYGTGRSAGVTPSG-YTLADMADELADLALASQHTIERHYFV  
D2MBB4\_RHOPA\_24-258 -----VLSAGLGGSGRFWQPLSALGQH-FRVTYDQYGTGRSAGVTPSG-YTLADMADELADLALASQHTIERHYFV  
gi|159185242|ref|NP\_355444\_2|\_j... MHFVHGRTRDAEAPTVLSAGLGGSGRFWQPLSALGQH-FRVTYDQYGTGRSAGVTPSG-YTLADMADELADLALASQHTIERHYFV  
Q7CWK3\_AGR75\_16-250 -----VLSAGLGGSGRFWQPLSALGQH-FRVTYDQYGTGRSAGVTPSG-YTLADMADELADLALASQHTIERHYFV  
gi|222080882|ref|YP\_002540245|... MHFVHGRTRDAEAPTVLSAGLGGSGRFWQPLSALGQH-FRVTYDQYGTGRSAGVTPSG-YTLADMADELADLALASQHTIERHYFV  
B9UL76\_AGRKK\_16-250 -----VLSAGLGGSGRFWQPLSALGQH-FRVTYDQYGTGRSAGVTPSG-YTLADMADELADLALASQHTIERHYFV  
gi|239817801|ref|YP\_002946711|... MPLHYEVHGPADEA-----VLSAGLGGSGRFWQPLSALGQH-FRVTYDQYGTGRSAGVTPSG-YTLADMADELADLALASQHTIERHYFV  
C5CM82\_YARFP\_16-250 -----VLSAGLGGSGRFWQPLSALGQH-FRVTYDQYGTGRSAGVTPSG-YTLADMADELADLALASQHTIERHYFV  
gi|167647941|ref|YP\_001685604|... MQSGTDLXLYHEHGPADRQTVLSAGLGGSGRFWQPLSALGQH-FRVTYDQYGTGRSAGVTPSG-YTLADMADELADLALASQHTIERHYFV  
B0SM62\_CAUSK\_24-258 -----VLSAGLGGSGRFWQPLSALGQH-FRVTYDQYGTGRSAGVTPSG-YTLADMADELADLALASQHTIERHYFV  
gi|295689471|ref|YP\_003593164|... MTTGVDGIGYEVHGMVAGREVLVLSAGLGGSGRFWQPLSALGQH-FRVTYDQYGTGRSAGVTPSG-YTLADMADELADLALASQHTIERHYFV  
D0XXH0\_9CAUL\_24-258 -----VLSAGLGGSGRFWQPLSALGQH-FRVTYDQYGTGRSAGVTPSG-YTLADMADELADLALASQHTIERHYFV  
gi|16127029|ref|NP\_421593\_1|\_a... MKRMTIGTVLGLYHEHGPAGREVLVLSAGLGGSGRFWQPLSALGQH-FRVTYDQYGTGRSAGVTPSG-YTLADMADELADLALASQHTIERHYFV  
B8HLQ3\_CAUCN\_27-261 -----VLSAGLGGSGRFWQPLSALGQH-FRVTYDQYGTGRSAGVTPSG-YTLADMADELADLALASQHTIERHYFV  
Q9A4N3\_CAUCR\_27-261 -----VLSAGLGGSGRFWQPLSALGQH-FRVTYDQYGTGRSAGVTPSG-YTLADMADELADLALASQHTIERHYFV  
gi|170747999|ref|YP\_001754259|... MGPLHHAVALG-----VLSAGLGGSGRFWQPLSALGQH-FRVTYDQYGTGRSAGVTPSG-YTLADMADELADLALASQHTIERHYFV  
BLM515\_METRJ\_17-251 -----VLSAGLGGSGRFWQPLSALGQH-FRVTYDQYGTGRSAGVTPSG-YTLADMADELADLALASQHTIERHYFV  
gi|218530013|ref|YP\_002420829|... MAAPVHHEVHGP-----VLSAGLGGSGRFWQPLSALGQH-FRVTYDQYGTGRSAGVTPSG-YTLADMADELADLALASQHTIERHYFV  
B7KWT4\_METC4\_18-252 -----VLSAGLGGSGRFWQPLSALGQH-FRVTYDQYGTGRSAGVTPSG-YTLADMADELADLALASQHTIERHYFV  
gi|163851162|ref|YP\_001639205|... MAAPVHHEVHGP-----VLSAGLGGSGRFWQPLSALGQH-FRVTYDQYGTGRSAGVTPSG-YTLADMADELADLALASQHTIERHYFV  
A9W3H8\_METEP\_18-252 -----VLSAGLGGSGRFWQPLSALGQH-FRVTYDQYGTGRSAGVTPSG-YTLADMADELADLALASQHTIERHYFV  
gi|240138315|ref|YP\_002962787|... MAAPVHHEVHGP-----VLSAGLGGSGRFWQPLSALGQH-FRVTYDQYGTGRSAGVTPSG-YTLADMADELADLALASQHTIERHYFV  
C5B0U6\_METEA\_18-252 -----VLSAGLGGSGRFWQPLSALGQH-FRVTYDQYGTGRSAGVTPSG-YTLADMADELADLALASQHTIERHYFV  
gi|254560857|ref|YP\_003067952|... MAAPVHHEVHGP-----VLSAGLGGSGRFWQPLSALGQH-FRVTYDQYGTGRSAGVTPSG-YTLADMADELADLALASQHTIERHYFV  
C7CM33\_METED\_18-252 -----VLSAGLGGSGRFWQPLSALGQH-FRVTYDQYGTGRSAGVTPSG-YTLADMADELADLALASQHTIERHYFV  
gi|118560343|ref|YP\_001923788|... MAAPVHHEVHGP-----VLSAGLGGSGRFWQPLSALGQH-FRVTYDQYGTGRSAGVTPSG-YTLADMADELADLALASQHTIERHYFV  
BLZB18\_METEP\_18-252 -----VLSAGLGGSGRFWQPLSALGQH-FRVTYDQYGTGRSAGVTPSG-YTLADMADELADLALASQHTIERHYFV  
gi|158424120|ref|YP\_001525412|... MPYAHGGDADLYIETHGAPTVLSAGMGGGAPFWPQTEALAAH-HQVILYDHAGTGRSAGVTPSG-YTLADMADELADLALASQHTIERHYFV  
A8IAD8\_AZOC5\_22-255 -----VLSAGMGGGAPFWPQTEALAAH-HQVILYDHAGTGRSAGVTPSG-YTLADMADELADLALASQHTIERHYFV

120 130 140 150 160 170 180 190 200 210 220  
GHS TGAGMIVLGAQAP-----ERIASLVLYATWAEIDQMBESCSILRRLLRGMGEAEYHRAATPLFLYPPYMRDHKADLEREVAALIAATPSSRIMDARAAGIMAFDGLR  
GHS TGGAMGIVLGAQAP-----ERIASLVLYATWAEIDQMBESCSILRRLLRGMGEAEYHRAATPLFLYPPYMRDHKADLEREVAALIAATPSSRIMDARAAGIMAFDGLR  
gi|300715742|ref|YP\_003740545\_1|... TGGALVGMQALDYP-----DLAGMVMYASWAKSDRHNWCFRMRALLVGSVTEEYVHGSALFLYPPDHVRAANAEVLSALLAALAHFQKNNLRLRLNALKRAFDFSH  
gi|260429719|ref|ZP\_05783695\_1|... GHS TGGCIVQTLAATAP-----SERVERLALSAAWIKPGNYLITALFELRGLLHRD-PRAYAESALLSYAPGWLSEHWKCYERATANPADPQKVAIVRILVLDGFSG  
GHS TGGCIVQTLAATAP-----SERVERLALSAAWIKPGNYLITALFELRGLLHRD-PRAYAESALLSYAPGWLSEHWKCYERATANPADPQKVAIVRILVLDGFSG  
gi|114762401|ref|ZP\_01441859\_1|... GHS TGGCIVQTLAATA-----SERVERLALSAAWIKPGNYLITALFELRGLLHRD-PRAYAESALLSYAPGWLSEHWKCYERATANPADPQKVAIVRILVLDGFSG  
GHS TGGCIVQTLAATA-----SERVERLALSAAWIKPGNYLITALFELRGLLHRD-PRAYAESALLSYAPGWLSEHWKCYERATANPADPQKVAIVRILVLDGFSG  
gi|90418551|ref|ZP\_01226463\_1|... GHS TGGCIVQTLAATA-----SERVERLALSAAWIKPGNYLITALFELRGLLHRD-PRAYAESALLSYAPGWLSEHWKCYERATANPADPQKVAIVRILVLDGFSG  
GHS TGGCIVQTLAATA-----SERVERLALSAAWIKPGNYLITALFELRGLLHRD-PRAYAESALLSYAPGWLSEHWKCYERATANPADPQKVAIVRILVLDGFSG  
gi|136600731|ref|NP\_888291\_1|\_p... GHS TGGCIVQTLAATA-----SERVERLALSAAWIKPGNYLITALFELRGLLHRD-PRAYAESALLSYAPGWLSEHWKCYERATANPADPQKVAIVRILVLDGFSG  
GHS TGGCIVQTLAATA-----SERVERLALSAAWIKPGNYLITALFELRGLLHRD-PRAYAESALLSYAPGWLSEHWKCYERATANPADPQKVAIVRILVLDGFSG  
gi|33594897|ref|NP\_884540\_1|\_p... GHS TGGCIVQTLAATA-----SERVERLALSAAWIKPGNYLITALFELRGLLHRD-PRAYAESALLSYAPGWLSEHWKCYERATANPADPQKVAIVRILVLDGFSG  
GHS TGGCIVQTLAATA-----SERVERLALSAAWIKPGNYLITALFELRGLLHRD-PRAYAESALLSYAPGWLSEHWKCYERATANPADPQKVAIVRILVLDGFSG  
gi|33592963|ref|NP\_880607\_1|\_p... GHS TGGCIVQTLAATA-----SERVERLALSAAWIKPGNYLITALFELRGLLHRD-PRAYAESALLSYAPGWLSEHWKCYERATANPADPQKVAIVRILVLDGFSG  
GHS TGGCIVQTLAATA-----SERVERLALSAAWIKPGNYLITALFELRGLLHRD-PRAYAESALLSYAPGWLSEHWKCYERATANPADPQKVAIVRILVLDGFSG  
gi|Q7X84\_BORPE\_30-260... GHS TGGCIVQTLAATA-----SERVERLALSAAWIKPGNYLITALFELRGLLHRD-PRAYAESALLSYAPGWLSEHWKCYERATANPADPQKVAIVRILVLDGFSG  
GHS TGGCIVQTLAATA-----SERVERLALSAAWIKPGNYLITALFELRGLLHRD-PRAYAESALLSYAPGWLSEHWKCYERATANPADPQKVAIVRILVLDGFSG  
gi|Q7M51\_BORPA\_30-260... GHS TGGCIVQTLAATA-----SERVERLALSAAWIKPGNYLITALFELRGLLHRD-PRAYAESALLSYAPGWLSEHWKCYERATANPADPQKVAIVRILVLDGFSG  
GHS TGGCIVQTLAATA-----SERVERLALSAAWIKPGNYLITALFELRGLLHRD-PRAYAESALLSYAPGWLSEHWKCYERATANPADPQKVAIVRILVLDGFSG  
gi|119383793|ref|YP\_914849\_1|\_j... GHS TGGCIVQTLAATA-----SERVERLALSAAWIKPGNYLITALFELRGLLHRD-PRAYAESALLSYAPGWLSEHWKCYERATANPADPQKVAIVRILVLDGFSG  
GHS TGGCIVQTLAATA-----SERVERLALSAAWIKPGNYLITALFELRGLLHRD-PRAYAESALLSYAPGWLSEHWKCYERATANPADPQKVAIVRILVLDGFSG  
gi|A1B0V9\_PARDP\_23-255... GHS TGGCIVQTLAATA-----SERVERLALSAAWIKPGNYLITALFELRGLLHRD-PRAYAESALLSYAPGWLSEHWKCYERATANPADPQKVAIVRILVLDGFSG  
GHS TGGCIVQTLAATA-----SERVERLALSAAWIKPGNYLITALFELRGLLHRD-PRAYAESALLSYAPGWLSEHWKCYERATANPADPQKVAIVRILVLDGFSG  
gi|298291572|ref|YP\_003693511|... GHS TGGCIVQTLAATA-----SERVERLALSAAWIKPGNYLITALFELRGLLHRD-PRAYAESALLSYAPGWLSEHWKCYERATANPADPQKVAIVRILVLDGFSG  
GHS TGGCIVQTLAATA-----SERVERLALSAAWIKPGNYLITALFELRGLLHRD-PRAYAESALLSYAPGWLSEHWKCYERATANPADPQKVAIVRILVLDGFSG  
gi|B317K9\_ECOLX\_16-250... GHS TGGCIVQTLAATA-----SERVERLALSAAWIKPGNYLITALFELRGLLHRD-PRAYAESALLSYAPGWLSEHWKCYERATANPADPQKVAIVRILVLDGFSG  
GHS TGGCIVQTLAATA-----SERVERLALSAAWIKPGNYLITALFELRGLLHRD-PRAYAESALLSYAPGWLSEHWKCYERATANPADPQKVAIVRILVLDGFSG  
gi|B3WNU4\_ECOLX\_16-250... GHS TGGCIVQTLAATA-----SERVERLALSAAWIKPGNYLITALFELRGLLHRD-PRAYAESALLSYAPGWLSEHWKCYERATANPADPQKVAIVRILVLDGFSG  
GHS TGGCIVQTLAATA-----SERVERLALSAAWIKPGNYLITALFELRGLLHRD-PRAYAESALLSYAPGWLSEHWKCYERATANPADPQKVAIVRILVLDGFSG  
gi|C8U5H1\_ECOLX\_16-250... GHS TGGCIVQTLAATA-----SERVERLALSAAWIKPGNYLITALFELRGLLHRD-PRAYAESALLSYAPGWLSEHWKCYERATANPADPQKVAIVRILVLDGFSG  
GHS TGGCIVQTLAATA-----SERVERLALSAAWIKPGNYLITALFELRGLLHRD-PRAYAESALLSYAPGWLSEHWKCYERATANPADPQKVAIVRILVLDGFSG  
gi|B61985\_ECOSE\_16-250... GHS TGGCIVQTLAATA-----SERVERLALSAAWIKPGNYLITALFELRGLLHRD-PRAYAESALLSYAPGWLSEHWKCYERATANPADPQKVAIVRILVLDGFSG  
GHS TGGCIVQTLAATA-----SERVERLALSAAWIKPGNYLITALFELRGLLHRD-PRAYAESALLSYAPGWLSEHWKCYERATANPADPQKVAIVRILVLDGFSG  
gi|C6EHJ8\_ECOBD\_16-250... GHS TGGCIVQTLAATA-----SERVERLALSAAWIKPGNYLITALFELRGLLHRD-PRAYAESALLSYAPGWLSEHWKCYERATANPADPQKVAIVRILVLDGFSG  
GHS TGGCIVQTLAATA-----SERVERLALSAAWIKPGNYLITALFELRGLLHRD-PRAYAESALLSYAPGWLSEHWKCYERATANPADPQKVAIVRILVLDGFSG  
gi|C4Q2D7\_ECOLX\_16-250... GHS TGGCIVQTLAATA-----SERVERLALSAAWIKPGNYLITALFELRGLLHRD-PRAYAESALLSYAPGWLSEHWKCYERATANPADPQKVAIVRILVLDGFSG  
GHS TGGCIVQTLAATA-----SERVERLALSAAWIKPGNYLITALFELRGLLHRD-PRAYAESALLSYAPGWLSEHWKCYERATANPADPQKVAIVRILVLDGFSG  
gi|RUTD\_ECOB1\_16-250... GHS TGGCIVQTLAATA-----SERVERLALSAAWIKPGNYLITALFELRGLLHRD-PRAYAESALLSYAPGWLSEHWKCYERATANPADPQKVAIVRILVLDGFSG  
GHS TGGCIVQTLAATA-----SERVERLALSAAWIKPGNYLITALFELRGLLHRD-PRAYAESALLSYAPGWLSEHWKCYERATANPADPQKVAIVRILVLDGFSG  
gi|B7M8Z4\_ECO8A\_16-250... GHS TGGCIVQTLAATA-----SERVERLALSAAWIKPGNYLITALFELRGLLHRD-PRAYAESALLSYAPGWLSEHWKCYERATANPADPQKVAIVRILVLDGFSG  
GHS TGGCIVQTLAATA-----SERVERLALSAAWIKPGNYLITALFELRGLLHRD-PRAYAESALLSYAPGWLSEHWKCYERATANPADPQKVAIVRILVLDGFSG  
gi|C9QZ67\_ECOB1\_16-250... GHS TGGCIVQTLAATA-----SERVERLALSAAWIKPGNYLITALFELRGLLHRD-PRAYAESALLSYAPGWLSEHWKCYERATANPADPQKVAIVRILVLDGFSG  
GHS TGGCIVQTLAATA-----SERVERLALSAAWIKPGNYLITALFELRGLLHRD-PRAYAESALLSYAPGWLSEHWKCYERATANPADPQKVAIVRILVLDGFSG  
gi|C5W2W8\_ECOBB\_16-250... GHS TGGCIVQTLAATA-----SERVERLALSAAWIKPGNYLITALFELRGLLHRD-PRAYAESALLSYAPGWLSEHWKCYERATANPADPQKVAIVRILVLDGFSG  
GHS TGGCIVQTLAATA-----SERVERLALSAAWIKPGNYLITALFELRGLLHRD-PRAYAESALLSYAPGWLSEHWKCYERATANPADPQKVAIVRILVLDGFSG  
gi|G6UF00\_ECOBR\_16-250... GHS TGGCIVQTLAATA-----SERVERLALSAAWIKPGNYLITALFELRGLLHRD-PRAYAESALLSYAPGWLSEHWKCYERATANPADPQKVAIVRILVLDGFSG  
GHS TGGCIVQTLAATA-----SERVERLALSAAWIKPGNYLITALFELRGLLHRD-PRAYAESALLSYAPGWLSEHWKCYERATANPADPQKVAIVRILVLDGFSG  
gi|B31Q15\_ECOLX\_16-250... GHS TGGCIVQTLAATA-----SERVERLALSAAWIKPGNYLITALFELRGLLHRD-PRAYAESALLSYAPGWLSEHWKCYERATANPADPQKVAIVRILVLDGFSG  
GHS TGGCIVQTLAATA-----SERVERLALSAAWIKPGNYLITALFELRGLLHRD-PRAYAESALLSYAPGWLSEHWKCYERATANPADPQKVAIVRILVLDGFSG  
gi|B3XRU2\_ECOLX\_16-250... GHS TGGCIVQTLAATA-----SERVERLALSAAWIKPGNYLITALFELRGLLHRD-PRAYAESALLSYAPGWLSEHWKCYERATANPADPQKVAIVRILVLDGFSG  
GHS TGGCIVQTLAATA-----SERVERLALSAAWIKPGNYLITALFELRGLLHRD-PRAYAESALLSYAPGWLSEHWKCYERATANPADPQKVAIVRILVLDGFSG  
gi|B1X9D0\_ECOHD\_16-250... GHS TGGCIVQTLAATA-----SERVERLALSAAWIKPGNYLITALFELRGLLHRD-PRAYAESALLSYAPGWLSEHWKCYERATANPADPQKVAIVRILVLDGFSG  
GHS TGGCIVQTLAATA-----SERVERLALSAAWIKPGNYLITALFELRGLLHRD-PRAYAESALLSYAPGWLSEHWKCYERATANPADPQKVAIVRILVLDGFSG  
gi|B2N536\_ECOLX\_16-250... GHS TGGCIVQTLAATA-----SERVERLALSAAWIKPGNYLITALFELRGLLHRD-PRAYAESALLSYAPGWLSEHWKCYERATANPADPQKVAIVRILVLDGFSG  
GHS TGGCIVQTLAATA-----SERVERLALSAAWIKPGNYLITALFELRGLLHRD-PRAYAESALLSYAPGWLSEHWKCYERATANPADPQKVAIVRILVLDGFSG  
gi|C8TNB9\_ECO26\_16-250... GHS TGGCIVQTLAATA-----SERVERLALSAAWIKPGNYLITALFELRGLLHRD-PRAYAESALLSYAPGWLSEHWKCYERATANPADPQKVAIVRILVLDGFSG  
GHS TGGCIVQTLAATA-----SERVERLALSAAWIKPGNYLITALFELRGLLHRD-PRAYAESALLSYAPGWLSEHWKCYERATANPADPQKVAIVRILVLDGFSG  
gi|C8UMM5\_ECO1A\_16-250... GHS TGGCIVQTLAATA-----SERVERLALSAAWIKPGNYLITALFELRGLLHRD-PRAYAESALLSYAPGWLSEHWKCYERATANPADPQKVAIVRILVLDGFSG  
GHS TGGCIVQTLAATA-----SERVERLALSAAWIKPGNYLITALFELRGLLHRD-PRAYAESALLSYAPGWLSEHWKCYERATANPADPQKVAIVRILVLDGFSG  
gi|B7LFB9\_ECO55\_16-250... GHS TGGCIVQTLAATA-----SERVERLALSAAWIKPGNYLITALFELRGLLHRD-PRAYAESALLSYAPGWLSEHWKCYERATANPADPQKVAIVRILVLDGFSG  
GHS TGGCIVQTLAATA-----SERVERLALSAAWIKPGNYLITALFELRGLLHRD-PRAYAESALLSYAPGWLSEHWKCYERATANPADPQKVAIVRILVLDGFSG  
gi|Q323A4\_SHISS\_16-250... GHS TGGCIVQTLAATA-----SERVERLALSAAWIKPGNYLITALFELRGLLHRD-PRAYAESALLSYAPGWLSEHWKCYERATANPADPQKVAIVRILVLDGFSG  
GHS TGGCIVQTLAATA-----SERVERLALSAAWIKPGNYLITALFELRGLLHRD-PRAYAESALLSYAPGWLSEHWKCYERATANPADPQKVAIVRILVLDGFSG  
gi|B3HD65\_ECOLX\_16-250... GHS TGGCIVQTLAATA-----SERVERLALSAAWIKPGNYLITALFELRGLLHRD-PRAYAESALLSYAPGWLSEHWKCYERATANPADPQKVAIVRILVLDGFSG  
GHS TGGCIVQTLAATA-----SERVERLALSAAWIKPGNYLITALFELRGLLHRD-PRAYAESALLSYAPGWLSEHWKCYERATANPADPQKVAIVRILVLDGFSG  
gi|B4ZYW4\_ECOHS\_16-250... GHS TGGCIVQTLAATA-----SERVERLALSAAWIKPGNYLITALFELRGLLHRD-PRAYAESALLSYAPGWLSEHWKCYERATANPADPQKVAIVRILVLDGFSG  
GHS TGGCIVQTLAATA-----SERVERLALSAAWIKPGNYLITALFELRGLLHRD-PRAYAESALLSYAPGWLSEHWKCYERATANPADPQKVAIVRILVLDGFSG  
gi|B1V988\_ECOLC\_16-250... GHS TGGCIVQTLAATA-----SERVERLALSAAWIKPGNYLITALFELRGLLHRD-PRAYAESALLSYAPGWLSEHWKCYERATANPADPQKVAIVRILVLDGFSG  
GHS TGGCIVQTLAATA-----SERVERLALSAAWIKPGNYLITALFELRGLLHRD-PRAYAESALLSYAPGWLSEHWKCYERATANPADPQKVAIVRILVLDGFSG  
gi|B2N1M4\_ECO57\_16-250... GHS TGGCIVQTLAATA-----SERVERLALSAAWIKPGNYLITALFELRGLLHRD-PRAYAESALLSYAPGWLSEHWKCYERATANPADPQKVAIVRILVLDGFSG  
GHS TGGCIVQTLAATA-----SERVERLALSAAWIKPGNYLITALFELRGLLHRD-PRAYAESALLSYAPGWLSEHWKCYERATANPADPQKVAIVRILVLDGFSG  
gi|B3BZK7\_ECO57\_16-250... GHS TGGCIVQTLAATA-----SERVERLALSAAWIKPGNYLITALFELRGLLHRD-PRAYAESALLSYAPGWLSEHWKCYERATANPADPQKVAIVRILVLDGFSG  
GHS TGGCIVQTLAATA-----SERVERLALSAAWIKPGNYLITALFELRGLLHRD-PRAYAESALLSYAPGWLSEHWKCYERATANPADPQKVAIVRILVLDGFSG  
gi|B3B146\_ECO57\_16-250... GHS TGGCIVQTLAATA-----SERVERLALSAAWIKPGNYLITALFELRGLLHRD-PRAYAESALLSYAPGWLSEHWKCYERATANPADPQKVAIVRILVLDGFSG  
GHS TGGCIVQTLAATA-----SERVERLALSAAWIKPGNYLITALFELRGLLHRD-PRAYAESALLSYAPGWLSEHWKCYERATANPADPQKVAIVRILVLDGFSG  
gi|B3AZR6\_ECO57\_16-250... GHS TGGCIVQTLAATA-----SERVERLALSAAWIKPGNYLITALFELRGLLHRD-PRAYAESALLSYAPGWLSEHWKCYERATANPADPQKVAIVRILVLDGFSG  
GHS TGGCIVQTLAATA-----SERVERLALSAAWIKPGNYLITALFELRGLLHRD-PRAYAESALLSYAPGWLSEHWKCYERATANPADPQKVAIVRILVLDGFSG  
gi|B3AK70\_ECO57\_16-250... GHS TGGCIVQTLAATA-----SERVERLALSAAWIKPGNYLITALFELRGLLHRD-PRAYAESALLSYAPGWLSEHWKCYERATANPADPQKVAIVRILVLDGFSG  
GHS TGGCIVQTLAATA-----SERVERLALSAAWIKPGNYLITALFELRGLLHRD-PRAYAESALLSYAPGWLSEHWKCYERATANPADPQKVAIVRILVLDGFSG





gi | 289626193 | ref | ZP\_06459147\_1 | SLARIQT--PTLLIANRDDMLVWPWQSQHLAEALPNARLVLLLEYGGASNIITDPLFPQRTLLDFLNAQT-----  
gi | 257482056 | ref | ZP\_05636097\_1 | SLARIQT--PTLLIANRDDMLVWPWQSQHLAEALPNARLVLLLEYGGASNIITDPLFPQRTLLDFLNAQT-----  
gi | 289648344 | ref | ZP\_06479687\_1 | SLARIQT--PTLLIANRDDMLVWPWQSQHLAEALPNARLVLLLEYGGASNIITDPLFPQRTLLDFLNAQT-----  
gi | 320325736 | gb | EFW81797\_1 | a | SLTRIQT--PTLLIANRDDMLVWPWQSQHLAEALPNARLVLLLEYGGASNIITDPLFPQRTLLDFLNAQT-----  
gi | 28868369 | ref | NP\_790988\_1 | a | QLARIQT--PTLLIANRDDMLVWPWQSQHLAEALPNARLVLLLEYGGASNIITDPLFPQRTLLDFLNAQT-----  
Q887X6\_PESM\_16-250 | QLARIQT--PTLLIANRDDMLVWPWQSQHLAEALPNARLVLLLEYGGASNIITDPLFPQRTLLDFLNAQT-----  
gi | 213967180 | ref | ZP\_03395329\_1 | QLARIQT--PTLLIANRDDMLVWPWQSQHLAEALPNARLVLLLEYGGASNIITDPLFPQRTLLDFLNAQT-----  
gi | 136155592 | ref | YP\_002125071 | KLGKITT--PTFALANKDMLVWPWQSQHLAEALPNARLVLLLEYGGASNIITDPLFPQRTLLDFLNAQT-----  
B4RRW2\_ALTMD\_35-269 | KLGKITT--PTFALANKDMLVWPWQSQHLAEALPNARLVLLLEYGGASNIITDPLFPQRTLLDFLNAQT-----  
gi | 239994720 | ref | ZP\_04715244\_1 | RLHAITT--PTLLIANRDDMLVWPWQSQHLAEALPNARLVLLLEYGGASNIITDPLFPQRTLLDFLNAQT-----  
gi | 262376021 | ref | ZP\_06069252\_1 | EHQALKIDIPHLLANQDDFLVWPYQSQHLAEALPNARLVLLLEYGGASNIITDPLFPQRTLLDFLNAQT-----  
D0S49\_ACILW\_16-255 | EHQALKIDIPHLLANQDDFLVWPYQSQHLAEALPNARLVLLLEYGGASNIITDPLFPQRTLLDFLNAQT-----  
gi | 293611018 | ref | ZP\_06693317\_1 | EHLQALQDTHLIVANQDDFLVPAHKSODIPTKLGHQGLCLPSGASNIITDPLFPQRTLLDFLNAQT-----  
gi | 262368332 | ref | ZP\_06061661\_1 | EIRAALQNTIPMHLIANQDDFLVWPYQSQHLAEALPNARLVLLLEYGGASNIITDPLFPQRTLLDFLNAQT-----  
D0S9G1\_ACIO\_16-250 | EIRAALQNTIPMHLIANQDDFLVWPYQSQHLAEALPNARLVLLLEYGGASNIITDPLFPQRTLLDFLNAQT-----  
gi | 50083320 | ref | YP\_044830\_1 | a | ARIDTLKQLPVCLIANQDDFLVWPYQSQHLAEALPNARLVLLLEYGGASNIITDPLFPQRTLLDFLNAQT-----  
Q6FFZ9\_ACIA\_16-255 | ARIDTLKQLPVCLIANQDDFLVWPYQSQHLAEALPNARLVLLLEYGGASNIITDPLFPQRTLLDFLNAQT-----  
gi | 255319344 | ref | ZP\_05360561\_1 | VARQIQN--PTLVLTNQDDFLVWPYQSQHLAEALPNARLVLLLEYGGASNIITDPLFPQRTLLDFLNAQT-----  
C6RN00\_ACIRA\_16-250 | VARQIQN--PTLVLTNQDDFLVWPYQSQHLAEALPNARLVLLLEYGGASNIITDPLFPQRTLLDFLNAQT-----  
D0T3M4\_ACIRA\_16-250 | VARQIQN--PTLVLTNQDDFLVWPYQSQHLAEALPNARLVLLLEYGGASNIITDPLFPQRTLLDFLNAQT-----  
gi | 316935661 | ref | YP\_004110643 | RLDEIRH--STLVASAKDDFLVWPYQSQHLAEALPNARLVLLLEYGGASNIITDPLFPQRTLLDFLNAQT-----  
D2MBB4\_RHOPA\_24-258 | RLDEIRH--STLVASAKDDFLVWPYQSQHLAEALPNARLVLLLEYGGASNIITDPLFPQRTLLDFLNAQT-----  
gi | 159185242 | ref | NP\_355444\_2 | RLGEIGN--PVLVATKDDLLVPPYTRSLRLAEBGLPQSELCLLDFGASNIITDPLFPQRTLLDFLNAQT-----  
Q7CW3\_AGR75\_16-250 | RLGEIGN--PVLVATKDDLLVPPYTRSLRLAEBGLPQSELCLLDFGASNIITDPLFPQRTLLDFLNAQT-----  
gi | 222080882 | ref | YP\_002540245 | RLSEIRT--PTLVVTRDDLLVPPYTRSLRLAEBGLPQSELCLLDFGASNIITDPLFPQRTLLDFLNAQT-----  
B9UL76\_AGRK\_16-250 | RLSEIRT--PTLVVTRDDLLVPPYTRSLRLAEBGLPQSELCLLDFGASNIITDPLFPQRTLLDFLNAQT-----  
gi | 239817801 | ref | YP\_002946711 | RLGAITA--PTLVAAMDMLVWPYQSQHLAEALPNARLVLLLEYGGASNIITDPLFPQRTLLDFLNAQT-----  
C5CN82\_YARPS\_16-250 | RLGAITA--PTLVAAMDMLVWPYQSQHLAEALPNARLVLLLEYGGASNIITDPLFPQRTLLDFLNAQT-----  
gi | 167647941 | ref | YP\_001685604 | DLLETIRC--PVLVASADDMLVPLSCSRRLAERLNATLDIAPWGGGFTVTPEAFNRAVLLDFLNAQT-----  
B0S62\_CAUSK\_24-258 | DLLETIRC--PVLVASADDMLVPLSCSRRLAERLNATLDIAPWGGGFTVTPEAFNRAVLLDFLNAQT-----  
gi | 295689471 | ref | YP\_003593164 | RLEEIPH--RVLVASADDMLVPMSCSQRLLAARLPNADFPQVAVGGGFTVTPEAFNRAVLLDFLNAQT-----  
D0XXH0\_9CAUL\_24-258 | RLEEIPH--RVLVASADDMLVPMSCSQRLLAARLPNADFPQVAVGGGFTVTPEAFNRAVLLDFLNAQT-----  
gi | 16127029 | ref | NP\_421593\_1 | a | RLEDITH--RVLISASADDMLVPMSCSQRLLAARLPNADFPQVAVGGGFTVTPEAFNRAVLLDFLNAQT-----  
B8HIQ3\_CAUCN\_27-261 | RLEDITH--RVLISASADDMLVPMSCSQRLLAARLPNADFPQVAVGGGFTVTPEAFNRAVLLDFLNAQT-----  
Q9A4N3\_CAUCN\_27-261 | RLEDITH--RVLISASADDMLVPMSCSQRLLAARLPNADFPQVAVGGGFTVTPEAFNRAVLLDFLNAQT-----  
gi | 170747999 | ref | YP\_001754259 | RLGAIGH--ETLVMAARDMLVPPYTRSERLAALPNARLDLAPEGGASNIITDPLFPQRTLLDFLNAQT-----  
B1M515\_METRJ\_17-251 | RLGAIGH--ETLVMAARDMLVPPYTRSERLAALPNARLDLAPEGGASNIITDPLFPQRTLLDFLNAQT-----  
gi | 218530013 | ref | YP\_002420829 | ALGRIPH--ETLLMAARDMLVPPYTRSERLAALPNARLDLAPEGGASNIITDPLFPQRTLLDFLNAQT-----  
B7KWT4\_METC4\_18-252 | ALGRIPH--ETLLMAARDMLVPPYTRSERLAALPNARLDLAPEGGASNIITDPLFPQRTLLDFLNAQT-----  
gi | 163851162 | ref | YP\_001639205 | ALPRIPH--ETLLMAARDMLVPPYTRSERLAALPNARLDLAPEGGASNIITDPLFPQRTLLDFLNAQT-----  
A9W3H8\_METEP\_18-252 | ALPRIPH--ETLLMAARDMLVPPYTRSERLAALPNARLDLAPEGGASNIITDPLFPQRTLLDFLNAQT-----  
gi | 240138315 | ref | YP\_002962787 | ALGRIPH--ETLLMAARDMLVPPYTRSERLAALPNARLDLAPEGGASNIITDPLFPQRTLLDFLNAQT-----  
C5B0U6\_METEA\_18-252 | ALGRIPH--ETLLMAARDMLVPPYTRSERLAALPNARLDLAPEGGASNIITDPLFPQRTLLDFLNAQT-----  
gi | 254560857 | ref | YP\_003067952 | ALARIPH--ETLLMAARDMLVPPYTRSERLAALPNARLDLAPEGGASNIITDPLFPQRTLLDFLNAQT-----  
C7CM33\_METED\_18-252 | ALARIPH--ETLLMAARDMLVPPYTRSERLAALPNARLDLAPEGGASNIITDPLFPQRTLLDFLNAQT-----  
gi | 188580343 | ref | YP\_001923788 | ALARIPH--ETLLMAARDMLVPPYTRSERLAALPNARLDLAPEGGASNIITDPLFPQRTLLDFLNAQT-----  
B1ZB18\_METPB\_18-252 | ALARIPH--ETLLMAARDMLVPPYTRSERLAALPNARLDLAPEGGASNIITDPLFPQRTLLDFLNAQT-----  
gi | 158424120 | ref | YP\_001525412 | RLADIRV--PTLLAAAKDDMLVPSYSLTLLAEGIPDARIAEVDWGAASNIITDPLFPQRTLLDFLNAQT-----  
A8IAD8\_AZOC5\_22-255 | RLADIRV--PTLLAAAKDDMLVPSYSLTLLAEGIPDARIAEVDWGAASNIITDPLFPQRTLLDFLNAQT-----

Fig S2. Two-dimensional projection of the CLANS clustering results obtained for the  $\alpha/\beta$ hydrolase\_6 sequences. Proteins are indicated by dots, and clusters are circled and labeled according to their membership in different families. Lines indicate sequence similarity as reported by BLAST and are colored in shades of grey according to the BLAST P-value. The diagram shows 14000 sequences remaining after initial clustering and is zoomed in on the RutD and PcaD clusters.

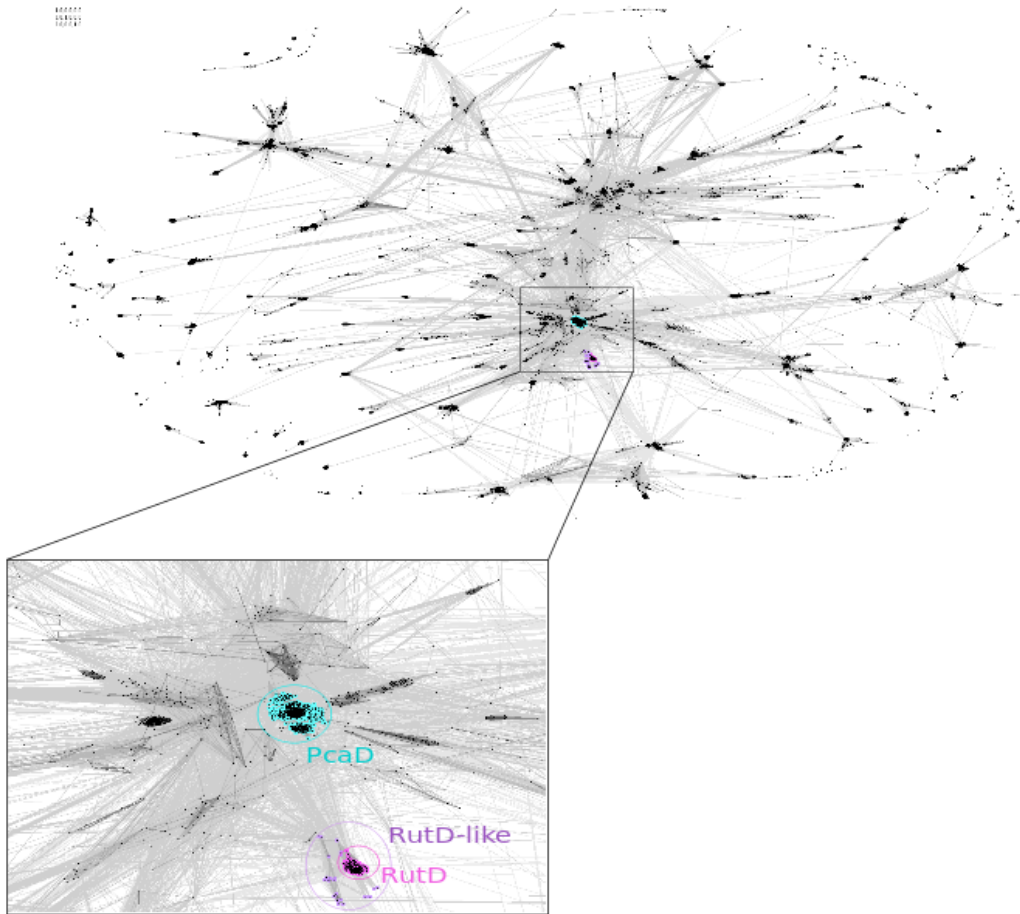



Fig.S3. Diffraction image of RutD crystal. Image shows presence of multiple crystal lattices.

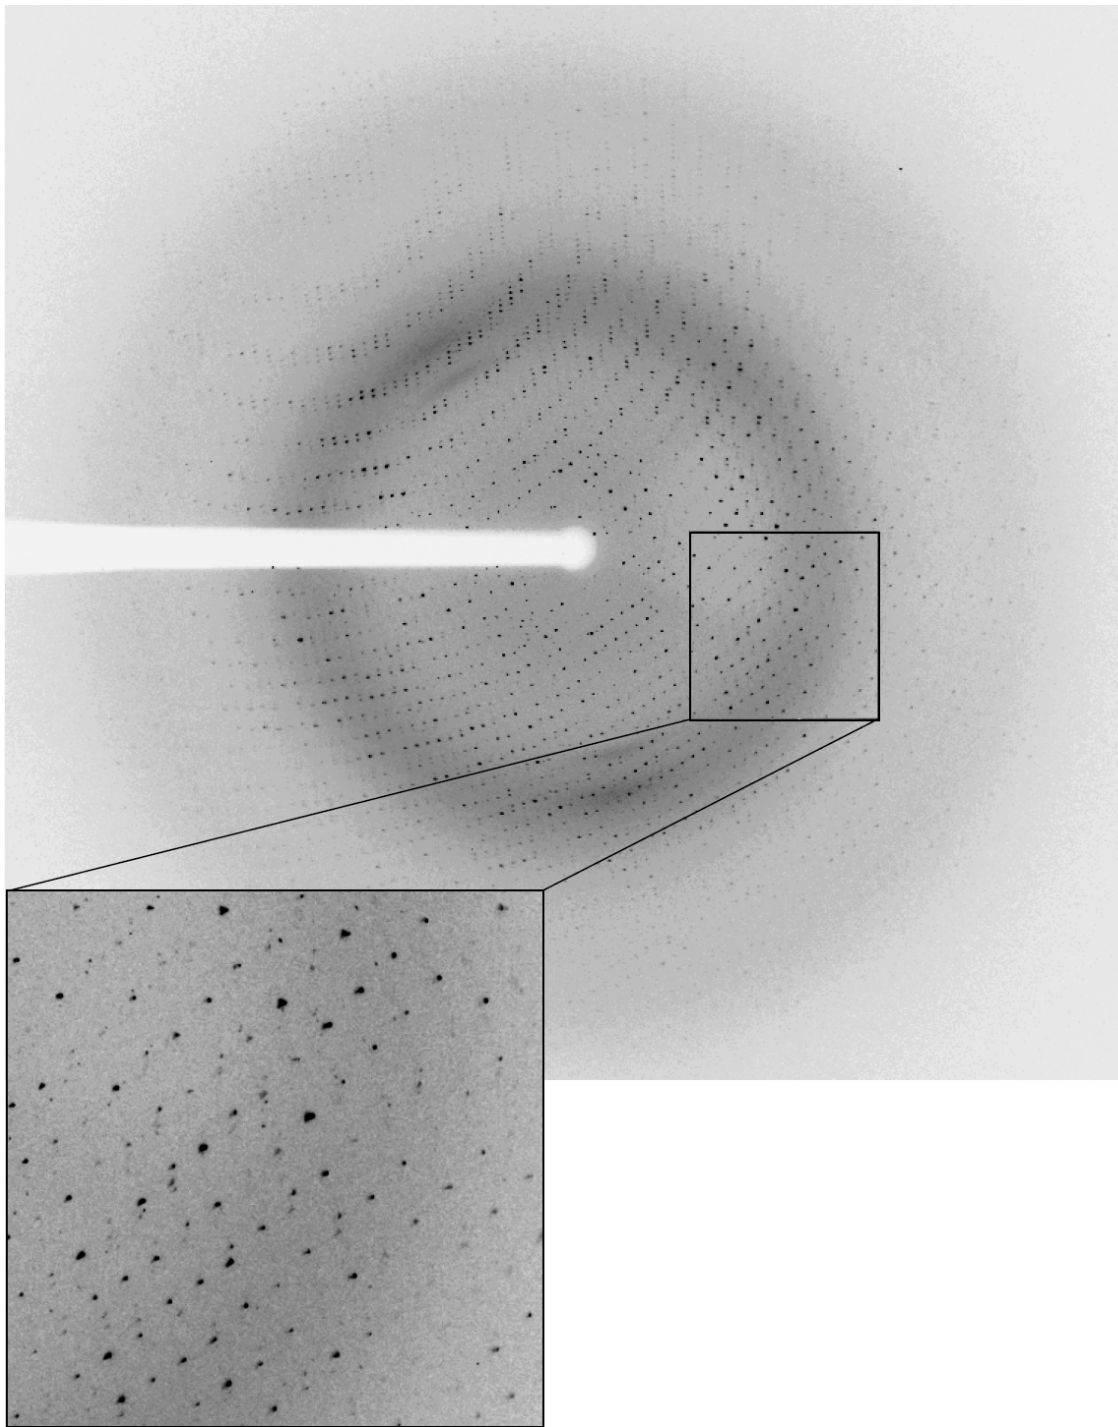

Supplement: NIHMS391190-supplement-Supp_Table_S1_Figure_S1-S3.pdf [file NIHMS391190-supplement-Supp_Table_S1_Figure_S1-S3.pdf]
